# Supplementary material
Source: publisher site journal article supplement (https://www.dovepress.com/get_supplementary_file.php?f=432856.xlsx)
Supplement: Supplementary file 1 [file get_supplementary_file.php]

## Sheet: Table S1
Table S1. Primer sequences for the amplification of the coding region of TPMT
Target exon	Primer ID	Primer sequence 5’-3’	Position in the NC_000006.12 RefSeq	PCR product length (bp)	Annealing Temp. (°C)	Primer Concentration (µM)
3	TPMT_1.1_F	GATGCACTGTGACTCGGGAG	g.18148841 - 18148860	513	58	0.9
	TPMT_1.1_R	ACACTACTGTACCCCAGGCT	g.18149334 - 18149653
4	TPMT_2.1_F	CCCCATTGGCTCCAAACTGAT	g.18147580 - 18147600	542	58	0.9
	TPMT_2.1_R	AGGAAAGCCCTGGGTGTAAG	g.18148102 - 18148121
5	TPMT_3.1_F	TGGCACATGATGGGTTCTCA	g.18143305 - 18143324	573	58	0.9
	TPMT_3.1_R	TCTGCTTTCCTGCATGTTCTTTG	g.18143855 - 18143877
6	TPMT_4.1_F	TGGCTCAGGTATCAGGGACTT	g.18139317 - 18139337	606	60	0.9
	TPMT_4.1_R	CTGAGTTGGCCCAAAAGAACC	g.18139902 - 18139922
7	TPMT_5.1_F	AGTGATTGAGCCACAAGCCTTA	g.18138743 - 18138764	385	60	0.9
	TPMT_5.1_R	TGAAGTACCAGCATGCACCAT	g.18139107 - 18139127
8	TPMT_6.1_F	ATCCATTTCCCCGCTCTTCTC	g.18133542 - 18133562	543	58	0.9
	TPMT_6.1_R	GCTTAGGCAGGGGCCATAAT	g.18134065 - 18134084
9	TPMT_7.1_F	GAGCATATTTACAGAGATTAGTTCC	g.18131664 - 18131688	734	58	0.9
	TPMT_7.1_R	ACCGGTTTAGCTGTCTCATC	g.18132378 - 18132397
10	TPMT_8.1_F	TCACATCATAATCTCCTCTCCAAA	g.18130434 - 18130457	800	58	0.9
	TPMT_8.1_R	GCCCTTAGCATTCCTCTGTT	g.18131214 - 18131233

## Sheet: Table S2
Table S2. Allelic and genotypic frequencies of TPMT genetic variants present in different Ecuadorian ethnic groups.
rs.	Molecular variants of TPMT (nomenclature considering the NC_000006.12, GRCh38.p14, chr 6)	Nucleotide changes according to the ref. seq. NM_000367.2	Aminoacid change according to the ref. seq. NP_000358.1	TPMT nomenclature	XXa	XYb	YYc	TOTAL	f(X)d	f(Y)e	f(XX)f	f(XY)g	f(YY)h	fobs. (XY)	fexpi (XY)	HWE p-value
rs529253611	g.18149211T>C	c.-44-40A>G	-		549	1	0	550	0.99909	0.00090909	0.998182	0.00181818	0	0.00182	0.00182	1
rs187635479	g.18149208T>C	c.-44-37A>G	-		549	1	0	550	0.99909	0.00090909	0.998182	0.00181818	0	0.00182	0.00182	1
rs372490350	g.18149149T>G	c.-22A>C	-		548	2	0	550	0.99818	0.0018182	0.996364	0.00363636	0	0.00364	0.00363	1
rs757081801	g.18149006T>C	c.122A>G	p.His41Arg		549	0	1	550	0.99818	0.0018182	0.998182	0.00181818	0	0	0.00363	0.00079
rs3931660	g.18148874A>T	c.140+114T>A	-		456	88	6	550	0.90909	0.090909	0.829091	0.16	0.0109091	0.16	0.16544	0.43519
rs4449636	g.18147788G>A	c.233+35C>T	-		100	289	161	550	0.44455	0.55545	0.181818	0.525455	0.292727	0.52545	0.4943	0.14147
rs17839846	g.18147729T>C	c.233+94A>G	-		489	56	5	550	0.94	0.06	0.889091	0.101818	0.00909091	0.10182	0.1129	0.03806
rs17839845	g.18147727C>A	c.233+96G>T	-		461	74	15	550	0.90545	0.094545	0.838182	0.134545	0.0272727	0.13455	0.17137	1e-05
rs1211157799	g.18147664G>A	c.233+159C>T	-		549	0	1	550	0.99909	0.00090909	0.998182	0	0.00181818	0.00182	0.00182	1
rs921551508	g.18147659T>A	c.233+164A>T	-		542	8	0	550	0.99273	0.0072727	0.985455	0.0145455	0	0.01455	0.01445	1
rs17839843	g.18143623G>A	c.339C>T	p.Thr113=		545	3	2	550	0.99364	0.0063636	0.990909	0.00545455	0.00363636	0.00545	0.01266	0.0001
rs2518463	g.18143538A>G	c.366+58T>C	-		115	262	170	550	0.44727	0.54727	0.210238	0.478976	0.310786	0.47898	0.4954	0.48706
rs775872403	g.18143505C>G	c.366+91G>C	-		548	2	0	550	0.99818	0.0018182	0.996364	0.00363636	0	0.00364	0.00363	1
rs549351527	g.18143486C>T	c.366+110G>A	-		548	2	0	550	0.99818	0.0018182	0.996364	0.00363636	0	0.00364	0.00363	1
rs753196732	g.18139754T>A	c.367-37A>T	-		477	71	0	550	0.93182	0.064545	0.870438	0.129562	0	0.12956	0.12128	0.15615
rs565239274	g.18139743T>A	c.367-26A>T	-		332	193	23	550	0.77909	0.21727	0.605839	0.35219	0.0419708	0.35219	0.34134	0.53089
rs1784109067	g.18139741A>C	c.367-24T>G	-		545	3	0	550	0.99364	0.0027273	0.994526	0.00547445	0	0.00547	0.00546	1
rs12201199	g.18139571A>T	c.419+94T>A	-		402	126	20	550	0.84545	0.15091	0.733577	0.229927	0.0364964	0.22993	0.25727	0.01914
rs56019966	g.18139041C>T	c.420-4G>A	-		549	1	0	550	0.99909	0.00090909	0.998182	0.00181818	0	0.00182	0.00182	1
rs1800460	g.18138997C>T	c.460G>A	p.Ala154Thr	TPMT*3B	479	68	3	550	0.93273	0.067273	0.870909	0.123636	0.00545455	0.12364	0.12561	0.72781
rs2842934	g.18138983G>A	c.474C>T	p.Ile158=		25	183	342	550	0.21182	0.78818	0.0454545	0.332727	0.621818	0.33273	0.33421	0.89784
rs6921269	g.18133847C>A	c.537G>T	p.Gln179His	TPMT*24	545	5	0	550	0.99545	0.0045455	0.990909	0.00909091	0	0.00909	0.00906	1
rs1783991183	g.18133805T>C	c.579A>G	p.Pro193=		547	3	0	550	0.99727	0.0027273	0.994545	0.00545455	0	0.00545	0.00544	1
rs2842949	g.18133790C>A	c.580+14G>T	-		99	222	229	550	0.38182	0.61818	0.18	0.403636	0.416364	0.40364	0.4725	0.0007
rs78846846	g.18132264G>A	c.581-87C>T	-		468	78	4	550	0.92182	0.078182	0.850909	0.141818	0.00727273	0.14182	0.14427	0.76391
rs1420983803	g.18132219C>G	c.581-42G>C	-		525	25	0	550	0.97727	0.022727	0.947653	0.0451264	0.00722022	0.04545	0.04446	1
rs116475442	g.18132069G>A	c.625+64C>T	-		546	4	0	550	0.99636	0.0036364	0.992727	0.00727273	0	0.00727	0.00725	1
rs146914017	g.18131906T>C	c.625+227A>G	-		549	1	0	550	0.99909	0.00090909	0.998182	0.00181818	0	0.00182	0.00182	1
rs542974211	g.18131796T>C	c.625+337A>G	-		549	1	0	550	0.99909	0.00090909	0.998182	0.00181818	0	0.00182	0.00182	1
rs971032284	g.18131037T>C	c.626-257A>G	-		548	0	2	550	0.99636	0.0036364	0.996364	0	0.00363636	0	0.00725	0
rs150972097	g.18130891C>A	c.626-111G>T	-		545	5	0	550	0.99545	0.0045455	0.990909	0.00909091	0	0.00909	0.00906	1
rs143550474	g.18130813T>C	c.626-33A>G	-		540	8	2	550	0.98909	0.010909	0.981818	0.0145455	0.00363636	0.01455	0.0216	0.00137
rs56161402	g.18130762C>T	c.644G>A	p.Arg215His	TPMT*8	547	3	0	550	0.99727	0.0027273	0.994545	0.00545455	0	0.00545	0.00544	1
rs1142345	g.18130687T>C	c.719A>G	p.Tyr240Cys	TPMT*3C	476	66	8	550	0.92545	0.074545	0.865455	0.12	0.0145455	0.12	0.1381	0.00656
Number of: ahomozygous individuals for the reference allele; bHeterozygous individuals; cHomozygous individuals for the minor allele; Allele frequencies for the dreference allele and eminor allele; Genotypic frequencies for fhomozygous with reference allele, gheterozygous and hhomozygous with minor allele, iexpected values of heterozygotes. Significant deviations from Hardy-Weinberg equilibrium w…

## Sheet: Table S3
Table S3. Significance p-values calculated for the Hardy-Weinberg equilibrium of molecular variants of TPMT in the Ecuadorian population.
TPMT variants	rs.	fobs. (XY)	fexp.(XY)	ECU		fobs.arl. (XY)	fexp.(XY)	AFE	AFE_CO	AFE_HG		fobs.arl. (XY)	fexp.(XY)	IND	IND_AZ	IND_HG		fobs.arl. (XY)	fexp.(XY)	MEZ	MEZ_AZ	MEZ_CO	MEZ_HG		fobs.arl. (XY)	fexp.(XY)	MON
c.-44-40A>G	rs529253611	0.00182	0.00182	1		0.01	0.01	1	1	-		-	-	-	-	-		-	-	-	-	-	-		-	-	-
c.-44-37A>G	rs187635479	0.00182	0.00182	1		-	-	-	-	-		-	-	-	-	-		-	-	-	-	-	-		0.03125	0.03125	1
c.-22A>C	rs372490350	0.00364	0.00363	1		0.02	0.0199	1	-	1		-	-	-	-	-		-	-	-	-	-	-		-	-	-
c.122A>G	rs757081801	0	0.00363	0.00087		-	-	-	-	-		0	0.01556	0.00408	-	0.00903		-	-	-	-	-	-		-	-	-
c.140+114T>A	rs3931660	0.16	0.16544	0.43437		0.23	0.2492	0.42419	0.36448	1		0.21875	0.21961	1	0.45359	1		0.12414	0.12266	1	1	1	0.35398		0.03125	0.03125	1
c.233+35C>T	rs4449636	0.52545	0.4943	0.14162		0.48	0.45106	0.65548	0.53603	1		0.54688	0.50184	0.37643	0.63193	0.4129		0.52759	0.49585	0.28797	0.22742	0.68902	0.73912		0.5625	0.50595	0.72153
c.233+94A>G	rs17839846	0.10182	0.1129	0.03824		-	-	-	-	-		0.17969	0.21369	0.08606	0.07305	1		0.1	0.10136	0.57145	0.28864	1	1		0.125	0.11905	1
c.233+96G>T	rs17839845	0.13455	0.17137	3e-05		0.18	0.24201	0.02139	0.36444	0.03684		0.17969	0.23698	0.01321	0.39613	0.03498		0.1069	0.12566	0.02958	0.35834	0.47813	0.0328		0.0625	0.06151	1
c.233+159C>T	rs1211157799	0.00182	0.00182	1		0.01	0.01	1	1	-		-	-	-	-	-		-	-	-	-	-	-		-	-	-
c.233+164A>T	rs921551508	0.01455	0.01445	1		0.01	0.01	1	-	1		-	-	-	-	-		0.02069	0.02051	1	-	1	1		0.03125	0.03125	1
c.339C>T	rs17839843	0.00545	0.01266	0.0001		0.01	0.01	1	1	-		-	-	-	-	-		0.0069	0.02051	0.0001	1	0.0051	0.01052		-	-	-
c.366+58T>C	rs2518463	0.47898	0.4954	0.48648		0.38	0.46854	0.08565	0.5354	0.12853		0.52344	0.50046	0.72169	1	0.408		0.48084	0.49766	0.63326	0.75945	0.42116	0.73584		0.59375	0.50744	0.47667
c.366+91G>C	rs775872403	0.00364	0.00363	1		-	-	-	-	-		-	-	-	-	-		-	-	-	-	-	-		0.0625	0.06151	1
c.366+110G>A	rs549351527	0.00364	0.00363	1		-	-	-	-	-		-	-	-	-	-		0.0069	0.00688	1	-	-	1		-	-	-
c.367-37A>T	rs753196732	0.12956	0.12128	0.15529		0.11111	0.10547	1	1	1		0.22656	0.20169	0.36688	1	0.32784		0.10035	0.09548	1	1	1	1		0.0625	0.06151	1
c.367-26A>T	rs565239274	0.35219	0.34134	0.52852		0.44444	0.43234	0.81915	1	0.7504		0.29688	0.31556	0.57157	1	0.28574		0.34256	0.3193	0.26792	0.32683	0.00312	0.07489		0.375	0.30952	0.557
c.367-24T>G	rs1784109067	0.00547	0.00546	1		0.0202	0.0201	1	1	1		-	-	-	-	-		0.00346	0.00346	1	-	1	-		-	-	-
c.419+94T>A	rs12201199	0.22993	0.25727	0.01911		0.44444	0.47541	0.53057	0.54102	1		0.25781	0.23698	0.464	1	0.66982		0.16263	0.16686	0.71792	1	0.34964	0.02624		0.0625	0.06151	1
c.420-4G>A	rs56019966	0.00182	0.00182	1		-	-	-	-	-		-	-	-	-	-		0.00345	0.00345	1	-	1	-		-	-	-
TPMT*3B (c.460G>A)	rs1800460	0.12364	0.12561	0.72764		0.08	0.07719	1	1	1		0.23438	0.21961	0.69134	1	0.66896		0.1	0.1075	0.22964	1	1	0.02374		0.03125	0.03125	1
c.474C>T	rs2842934	0.33273	0.33421	0.89908		0.29	0.27693	1	1	0.67291		0.29688	0.31556	0.57347	0.27718	1		0.35172	0.35219	1	0.43492	1	1		0.4375	0.41071	1
TPMT*24 (c.537G>T)	rs6921269	0.00909	0.00906	1		0.04	0.0394	1	-	1		-	-	-	-	-		0.00345	0.00345	1	-	1	-		-	-	-
c.579A>G	rs1783991183	0.00545	0.00544	1		-	-	-	-	-		0.01562	0.01556	1	1	-		0.00345	0.00345	1	1	-	-		-	-	-
c.580+14G>T	rs2842949	0.40364	0.4725	0.00084		0.46	0.49749	0.5441	0.12125	0.78897		0.35938	0.46225	0.01281	0.12045	0.05242		0.39655	0.44711	0.06548	0.49046	1	0.04516		0.46875	0.46776	1
c.581-87C>T	rs78846846	0.14182	0.14427	0.76441		0.15	0.15633	0.52343	1	0.35416		0.24219	0.22546	0.69203	1	0.66877		0.1069	0.1136	0.27217	1	1	0.05587		0.03125	0.03125	1
c.581-42G>C	rs1420983803	0.04545	0.04446	1		0.09	0.08638	1	-	1		0.02344	0.02325	1	1	1		0.04483	0.0439	1	1	1	1		-	-	-
c.625+64C>T	rs116475442	0.00727	0.00725	1		0.03	0.0297	1	1	1		-	-	-	-	-		0.00345	0.00345	1	-	1	-		-	-	-
c.625+227A>G	rs146914017	0.00182	0.00182	1		-	-	-	-	-		-	-	-	-	-		0.00345	0.00345	1	-	1	-		-	-	-
c.625+337A>G	rs542974211	0.00182	0.00182	1		0.01	0.01	1	1	-		-	-	-	-	-		-	-	-	-	-	-		-	-	-
c.626-257A>G	rs971032284	0	0.00725	0		0	0.0199	0.00522	-	0.00918		-	-	-	-	-		0	0.00688	0.00183	-	-	0.00351		-	-	-
c.626-111G>T	rs150972097	0.00909	0.00906	1		0.03	0.0297	1	1	1		-	-	-	-	-		0.00345	0.00345	1	-	1	-		0.03125	0.03125	1
c.626-33A>G	rs143550474	0.01455	0.0216	0.00122		0.06	0.05849	1	1	1		-	-	-	-	-		0.00345	0.01712	4e-05	-	-	0.00182		0.03125	0.03125	1
TPMT*8 (c.644G>A)	rs56161402	0.00545	0.00544	1		0.01	0.01	1	1	-		-	-	-	-	-		0.0069	0.00688	1	-	1	1		-	-	-
TPMT*3C (c.719A>G)	rs1142345	0.12	0.1381	0.00661		0.12	0.14794	0.11063	1	0.04797		0.21094	0.21369	1	1	0.66952		0.08966	0.11056	0.01096	1	0.25243	0.00423		0.03125	0.03125	1
Significance values for the 34 TPMT SNVs found in the Ecuadorian population (ECU). The p-values are grouped according to the 4 ethnic groups studied (Afro-Ecuadorian, Indigenous, Mestizo, and Montubio). Within each group, deviations from the Hardy-Weinberg Equilibrium are shown for the total of each ethnic group (AFE, IND, MEZ, and MON), and also considering the geographic distribution of the Coa…

## Sheet: Table S4
Table S4. Pairwise genetic distances (FST) calculated from the TPMT genetic variants between different ethnicities within the Ecuadorian population.
	AFE	IND	MEZ	MON
AFE	-	<0.000	<0.000	<0.000
IND	0.06021	-	0.00901	0.01802
MEZ	0.06846	0.00566	-	0.3964
MON	0.0801	0.01162	-0.00157	-
FST values are arranged at the bottom diagonal of the table and the corresponding non-differentiation p-values at the top diagonal.

## Sheet: Table S5
Table S5. Linkage disequilibrium observed between the TPMT alleles within the ecuadorian population.
Loci1	Loci2	LD p-values
TPMT*3C (c.719A>G, rs1142345)	c.625+337A>G (rs542974211)	0.049901
TPMT*3C (c.719A>G, rs1142345)	c.581-87C>T (rs78846846)	0
TPMT*3C (c.719A>G, rs1142345)	c.580+14G>T (rs2842949)	0
TPMT*3C (c.719A>G, rs1142345)	TPMT*24 (c.537G>T, rs6921269)	0.0246535
TPMT*3C (c.719A>G, rs1142345)	TPMT*3B (c.460G>A, rs1800460)	0
TPMT*3C (c.719A>G, rs1142345)	c.419+94T>A (rs12201199)	0
TPMT*3C (c.719A>G, rs1142345)	c.367-26A>T (rs565239274)	0
TPMT*3C (c.719A>G, rs1142345)	c.367-37A>T (rs753196732)	0
TPMT*3C (c.719A>G, rs1142345)	c.366+58T>C (rs2518463)	0.0440594
TPMT*3C (c.719A>G, rs1142345)	c.233+159C>T (rs1211157799)	0.0174257
TPMT*3C (c.719A>G, rs1142345)	c.233+96G>T (rs17839845)	0
TPMT*3C (c.719A>G, rs1142345)	c.233+35C>T (rs4449636)	0.0449505
TPMT*3C (c.719A>G, rs1142345)	c.140+114T>A (rs3931660)	0
TPMT*3C (c.719A>G, rs1142345)	c.-44-37A>G (rs187635479)	0.0137624
c.626-33A>G (rs143550474)	c.626-257A>G (rs971032284)	0.0384158
c.626-33A>G (rs143550474)	c.580+14G>T (rs2842949)	0.00841584
c.626-33A>G (rs143550474)	c.474C>T (rs2842934)	0.00207921
c.626-33A>G (rs143550474)	c.366+110G>A (rs549351527)	0.0385149
c.626-33A>G (rs143550474)	c.122A>G (rs757081801)	0.0242574
c.626-111G>T (rs150972097)	c.580+14G>T (rs2842949)	0.0114851
c.626-111G>T (rs150972097)	TPMT*24 (c.537G>T, rs6921269)	0.0484158
c.626-111G>T (rs150972097)	c.367-26A>T (rs565239274)	0.0435644
c.626-111G>T (rs150972097)	c.366+58T>C (rs2518463)	0.0439604
c.626-111G>T (rs150972097)	c.233+96G>T (rs17839845)	0.00584158
c.626-111G>T (rs150972097)	c.140+114T>A (rs3931660)	0.00960396
c.626-257A>G (rs971032284)	c.366+58T>C (rs2518463)	0.0380198
c.626-257A>G (rs971032284)	c.-22A>C (rs372490350)	0.00653465
c.625+337A>G (rs542974211)	c.419+94T>A (rs12201199)	0.0384158
c.625+337A>G (rs542974211)	c.367-37A>T (rs753196732)	0
c.625+337A>G (rs542974211)	c.233+159C>T (rs1211157799)	0.000792079
c.625+337A>G (rs542974211)	c.233+96G>T (rs17839845)	0.029505
c.625+227A>G (rs146914017)	c.419+94T>A (rs12201199)	0.0326733
c.625+227A>G (rs146914017)	c.339C>T (rs17839843)	0.00346535
c.625+64C>T (rs116475442)	TPMT*24 (c.537G>T, rs6921269)	0.0376238
c.625+64C>T (rs116475442)	c.419+94T>A (rs12201199)	0.00247525
c.581-42G>C (rs1420983803)	c.233+94A>G (rs17839846)	0.0405941
c.581-87C>T (rs78846846)	c.580+14G>T (rs2842949)	0
c.581-87C>T (rs78846846)	c.474C>T (rs2842934)	0.00881188
c.581-87C>T (rs78846846)	TPMT*3B (c.460G>A, rs1800460)	0
c.581-87C>T (rs78846846)	c.419+94T>A (rs12201199)	0
c.581-87C>T (rs78846846)	c.367-26A>T (rs565239274)	0
c.581-87C>T (rs78846846)	c.367-37A>T (rs753196732)	0
c.581-87C>T (rs78846846)	c.366+58T>C (rs2518463)	0
c.581-87C>T (rs78846846)	c.233+96G>T (rs17839845)	0
c.581-87C>T (rs78846846)	c.233+35C>T (rs4449636)	0
c.581-87C>T (rs78846846)	c.140+114T>A (rs3931660)	0
c.580+14G>T (rs2842949)	c.474C>T (rs2842934)	0
c.580+14G>T (rs2842949)	TPMT*3B (c.460G>A, rs1800460)	0
c.580+14G>T (rs2842949)	c.419+94T>A (rs12201199)	0
c.580+14G>T (rs2842949)	c.367-26A>T (rs565239274)	0
c.580+14G>T (rs2842949)	c.367-37A>T (rs753196732)	0
c.580+14G>T (rs2842949)	c.366+58T>C (rs2518463)	0
c.580+14G>T (rs2842949)	c.339C>T (rs17839843)	0.00128713
c.580+14G>T (rs2842949)	c.233+96G>T (rs17839845)	0
c.580+14G>T (rs2842949)	c.233+94A>G (rs17839846)	0
c.580+14G>T (rs2842949)	c.233+35C>T (rs4449636)	0
c.580+14G>T (rs2842949)	c.140+114T>A (rs3931660)	0
c.474C>T (rs2842934)	TPMT*3B (c.460G>A, rs1800460)	0.0111881
c.474C>T (rs2842934)	c.419+94T>A (rs12201199)	0.0167327
c.474C>T (rs2842934)	c.367-26A>T (rs565239274)	0
c.474C>T (rs2842934)	c.367-37A>T (rs753196732)	0.0413861
c.474C>T (rs2842934)	c.339C>T (rs17839843)	0.010297
c.474C>T (rs2842934)	c.233+96G>T (rs17839845)	0.00267327
c.474C>T (rs2842934)	c.233+94A>G (rs17839846)	0
c.474C>T (rs2842934)	c.140+114T>A (rs3931660)	0.00633663
TPMT*3B (c.460G>A, rs1800460)	c.419+94T>A (rs12201199)	0
TPMT*3B (c.460G>A, rs1800460)	c.367-26A>T (rs565239274)	0
TPMT*3B (c.460G>A, rs1800460)	c.367-37A>T (rs753196732)	0
TPMT*3B (c.460G>A, rs1800460)	c.366+58T>C (rs2518463)	0.0159406
TPMT*3B (c.460G>A, rs1800460)	c.233+96G>T (rs17839845)	0
TPMT*3B (c.460G>A, rs1800460)	c.233+35C>T (rs4449636)	0
TPMT*3B (c.460G>A, rs1800460)	c.140+114T>A (rs3931660)	0
c.420-4G>A (rs56019966)	c.366+58T>C (rs2518463)	0
c.419+94T>A (rs12201199)	c.367-24T>G (rs1784109067)	0.0221782
c.419+94T>A (rs12201199)	c.367-26A>T (rs565239274)	0
c.419+94T>A (rs12201199)	c.367-37A>T (rs753196732)	0
c.419+94T>A (rs12201199)	c.366+58T>C (rs2518463)	0
c.419+94T>A (rs12201199)	c.339C>T (rs17839843)	0.030297
c.419+94T>A (rs12201199)	c.233+159C>T (rs1211157799)	0.0309901
c.419+94T>A (rs12201199)	c.233+96G>T (rs17839845)	0
c.419+94T>A (rs12201199)	c.233+35C>T (rs4449636)	0
c.419+94T>A (rs12201199)	c.140+114T>A (rs3931660)	0
c.419+94T>A (rs12201199)	c.122A>G (rs757081801)	0.0366337
c.419+94T>A (rs12201199)	c.-44-37A>G (rs187635479)	0.0409901
c.419+94T>A (rs12201199)	c.-44-40A>G (rs529253611)	0
c.367-24T>G (rs1784109067)	c.367-26A>T (rs565239274)	0.0168317
c.367-26A>T (rs565239274)	c.367-37A>T (rs753196732)	0
c.367-26A>T (rs565239274)	c.366+58T>C (rs2518463)	0
c.367-26A>T (rs565239274)	c.339C>T (rs17839843)	0.0153465
c.367-26A>T (rs565239274)	c.233+96G>T (rs17839845)	0
c.367-26A>T (rs565239274)	c.233+94A>G (rs17839846)	0.0228713
c.367-26A>T (rs565239274)	c.233+35C>T (rs4449636)	0
c.367-26A>T (rs565239274)	c.140+114T>A (rs3931660)	0
c.367-37A>T (rs753196732)	c.366+58T>C (rs2518463)	0.00415842
c.367-37A>T (rs753196732)	c.339C>T (rs17839843)	0.000990099
c.367-37A>T (rs753196732)	c.233+159C>T (rs1211157799)	0
c.367-37A>T (rs753196732)	c.233+96G>T (rs17839845)	0
c.367-37A>T (rs753196732)	c.233+35C>T (rs4449636)	0
c.367-37A>T (rs753196732)	c.140+114T>A (rs3931660)	0
c.367-37A>T (rs753196732)	c.122A>G (rs757081801)	0
c.367-37A>T (rs753196732)	c.-44-37A>G (rs187635479)	0
c.366+58T>C (rs2518463)	c.233+96G>T (rs17839845)	0
c.366+58T>C (rs2518463)	c.233+94A>G (rs17839846)	0
c.366+58T>C (rs2518463)	c.233+35C>T (rs4449636)	0
c.366+58T>C (rs2518463)	c.140+114T>A (rs3931660)	0
c.339C>T (rs17839843)	c.233+35C>T (rs4449636)	0.00881188
c.233+159C>T (rs1211157799)	c.233+96G>T (rs17839845)	0.0238614
c.233+96G>T (rs17839845)	c.233+35C>T (rs4449636)	0
c.233+96G>T (rs17839845)	c.140+114T>A (rs3931660)	0
c.233+96G>T (rs17839845)	c.122A>G (rs757081801)	0.0225743
c.233+96G>T (rs17839845)	c.-44-37A>G (rs187635479)	0.0209901
c.233+94A>G (rs17839846)	c.233+35C>T (rs4449636)	0
c.233+35C>T (rs4449636)	c.140+114T>A (rs3931660)	0
